# Supplementary material
Source: PubMed Central journal article supplement (PMC4979681)
Supplement: NIHMS69168-supplement-Supplementary_Material.pdf [file NIHMS69168-supplement-Supplementary_Material.pdf]

## Supplementary Material

### The active site of O-GlcNAc transferase imposes constraints on substrate sequence

Shalini Pathak<sup>1,a</sup>, Jana Alonso<sup>1,a</sup>, Marianne Schimpl<sup>1,a</sup>, Karim Rafie<sup>a</sup>, David E. Blair<sup>a</sup>, Vladimir S. Borodkin<sup>a</sup>, Osama Albarbarawi<sup>a</sup>, and Daan M. F. van Aalten<sup>a,b,2</sup>

#### Contents

**Figure S1.** ETD fragmentation spectra

**Table S2.** X-ray diffraction data collection and structure refinement statistics

**Fig. S2** Unbiased difference electron density for ligands

**Figure S3.** List of 32 hexapeptides derived from the peptide library hits used to generate the sequon for Fig. 4

**Figure S4.** Tolerance of different OGT isoforms for single amino acid substitutions

**Figure S1.**

ETD fragmentation followed by Proteome Discoverer search against a generic database that contains the full-length protein and the peptides submitted to glycomapping are shown below. *c* [+1] ions are in orange, *y* [+1] are in blue, and *z* [+1] are in green. The peptide sequence with the fragments identified is shown below the spectrum. The Thr(t)/Ser(s) amino acid that carries the O-GlcNAc is in bold lowercase.

**1. Protein RBL2\_HUMAN**

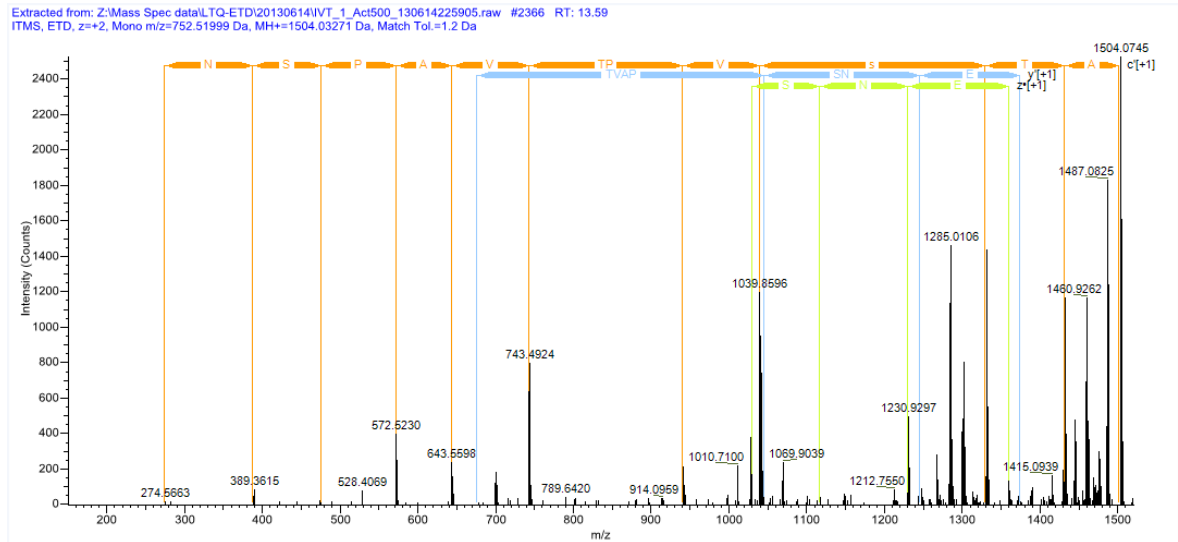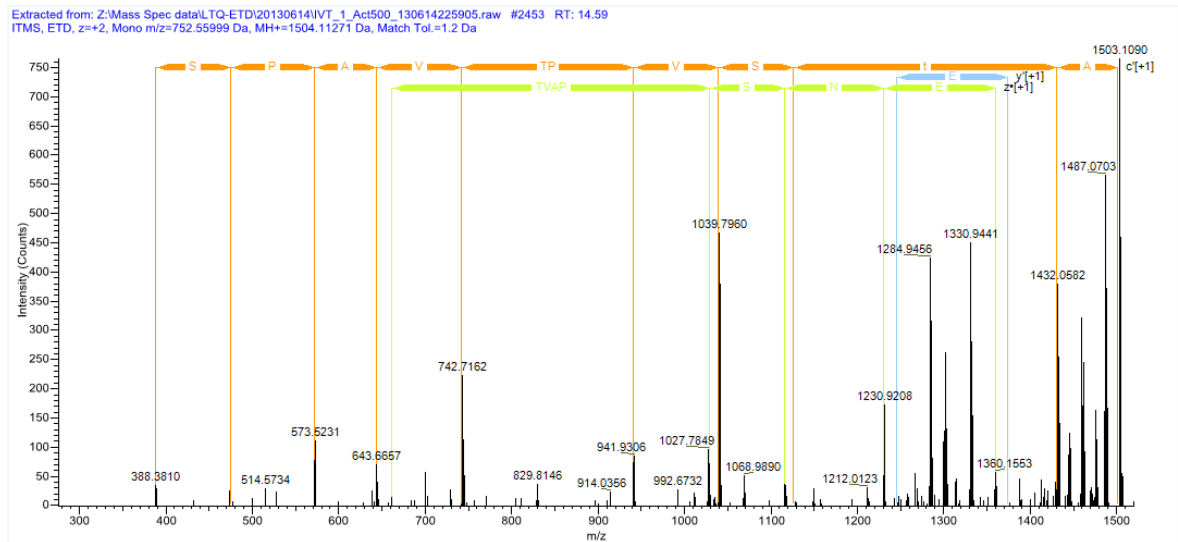

Extracted from: Z:\Mass Spec data\LTQ-ETD\20130614\VT\_1\_Ac1500\_130614225905.raw #2287 RT: 12.73  
 ITMS, ETD, z=+2, Mono m/z=853.52313 Da, MH+=1706.03899 Da, Match Tol.=1.2 Da

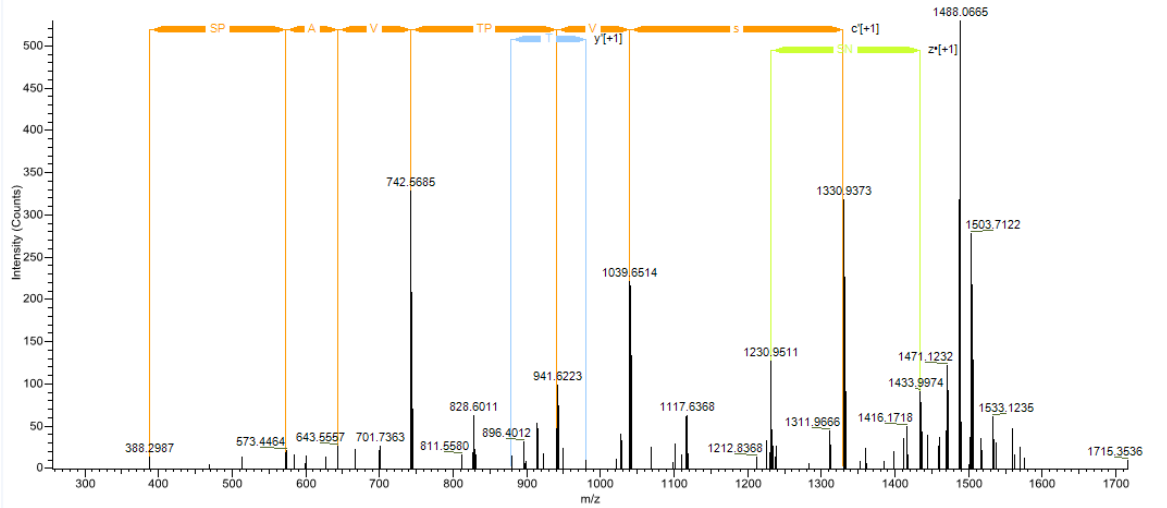

K E N [ N ] S [ P ] A [ V ] T [ P ] V [ s ] t A

## 2. M phase phospho protein-9 (MPP9\_HUMAN)

Extracted from: Z:\Mass Spec data\LTQ-ETD\20130614\VT\_2\_Ac1500.raw #2659 RT: 16.32  
 ITMS, ETD, z=+2, Mono m/z=831.10828 Da, MH+=1661.20928 Da, Match Tol.=1.2 Da

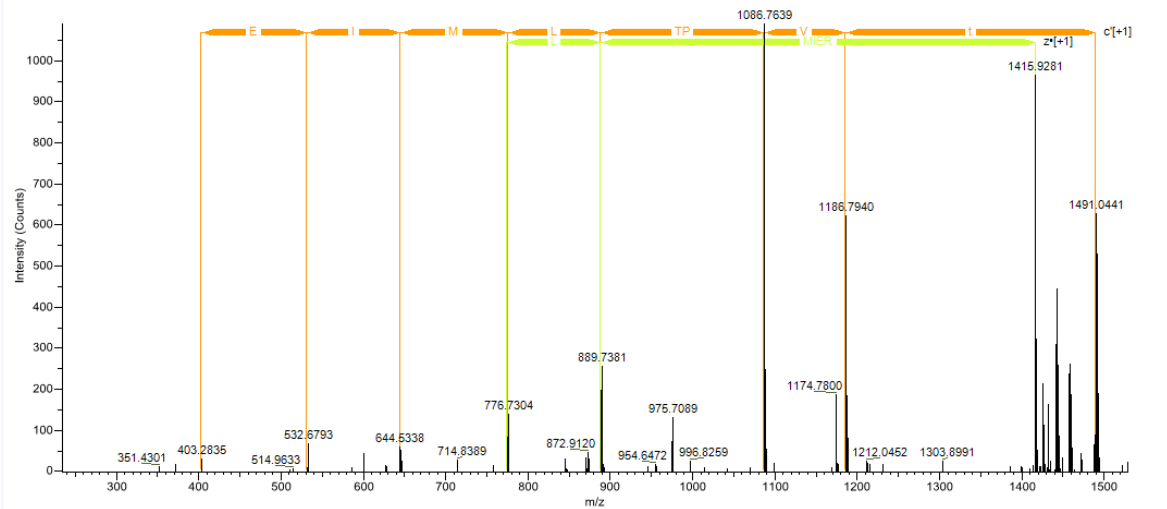

T K [ R ] E [ I ] M [ L ] T [ P ] V [ t ] V A

## 3. ELK1\_HUMAN

Extracted from: Z:\Ums AL\LTQ-ETD data\Sept 2013\20130907\2013122\_seqon.raw #9101 RT: 21.93  
 ITMS, ETD, z=+2, Mono m/z=870.94385 Da, MH+=1740.86042 Da, Match Tol.=1.2 Da

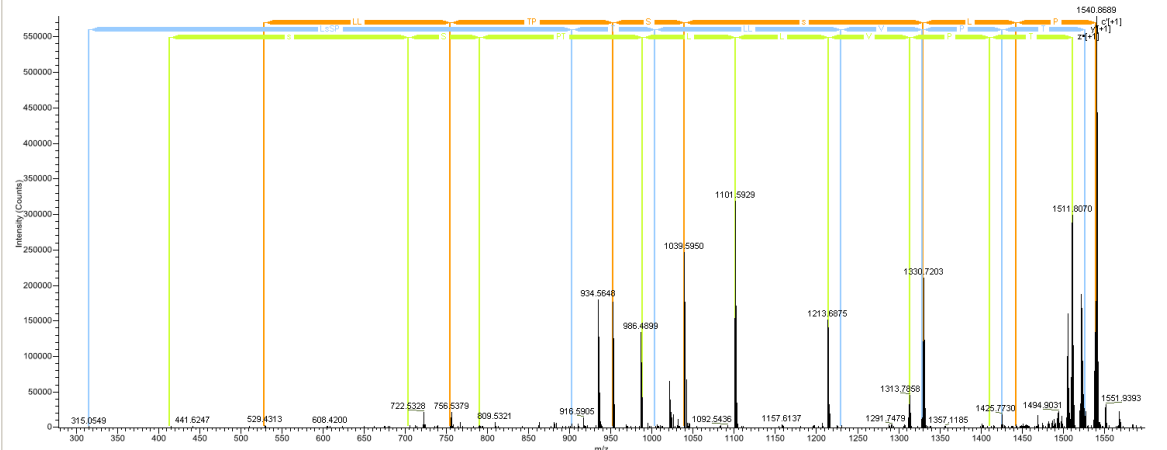

T L T P V L L T P S s L P S I

#### 4. FOXO1

Extracted from: Z:\Jana ALL TO ETD data\Sept 2019\201906072013124\_sequn.raw #9116 RT: 23.14  
 ITMS, ETD, z=+3, Mono m/z=647.2000 Da, MH+=1638.9404 Da, Match Tol.=1.2 Da

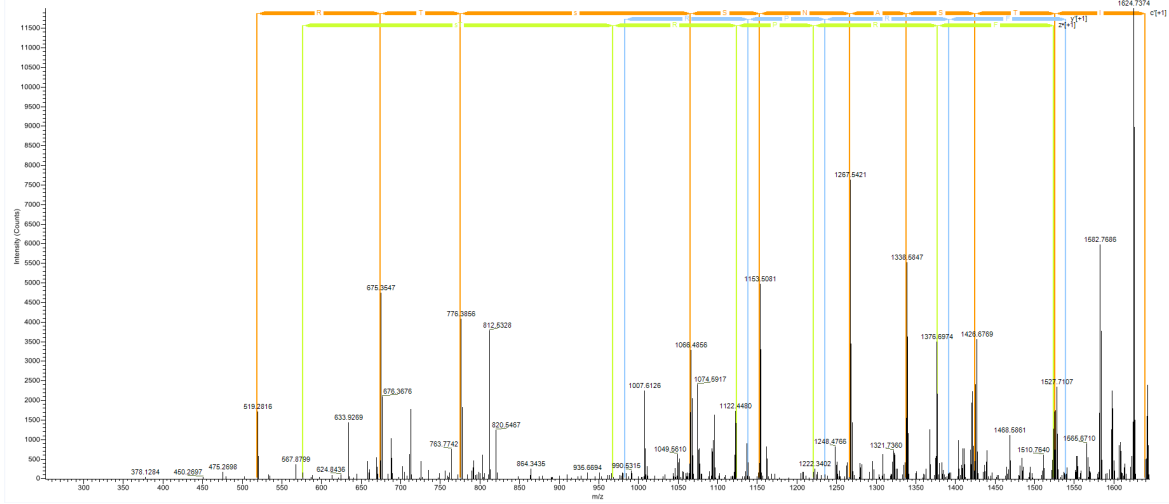

T F R P R T s S N A S T I

#### 5. ETS1

Extracted from: Z:\Mass Spec data\LTQ-ETD\20130614\IVT\_10\_Act500.raw #2816 RT: 16.62  
 ITMS, ETD, z=+3, Mono m/z=510.77536 Da, MH+=1530.31153 Da, Match Tol.=1.2 Da

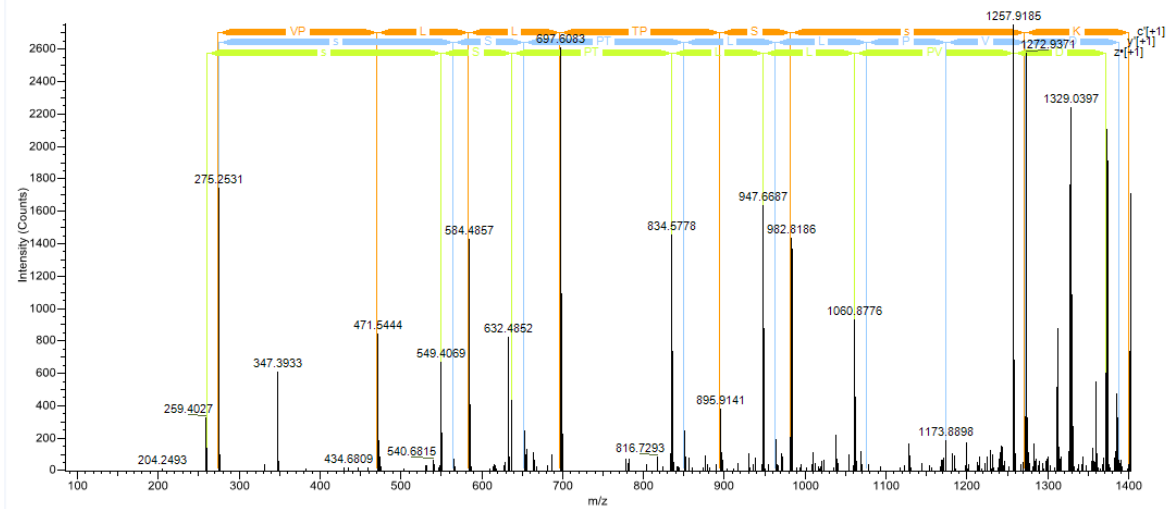

A A D V P L L T P S s K E

## 6. $\alpha$ -crystallin B chain

Extracted from: Z:\Jana ALL TO ETD data\Sept 2019\20190907\2019125\_seqon.raw #9560 RT: 41.80  
 ITMS, ETD, z=+2, Mono m/z=820.449 Da, MH+=1717.79670 Da, Match Tol.=1.2 Da

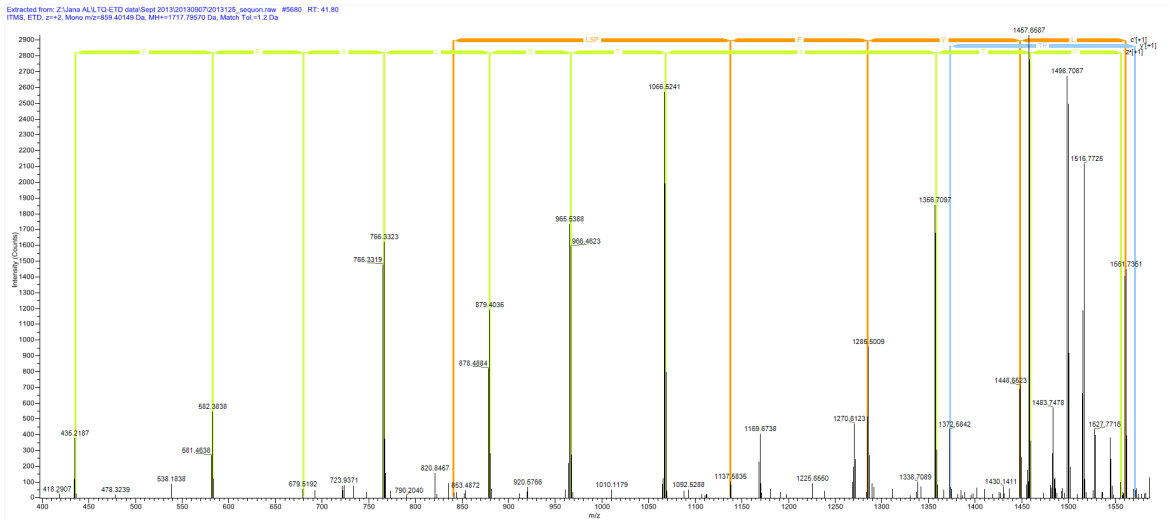

F P T S T S L S P F Y L R

## 7. Keratin 7

Extracted from: Z:\Mass Spec data\LTQ-ETD\20130614\VT\_8\_Act500.raw #2611 RT: 15.56  
 ITMS, ETD, z=+2, Mono m/z=758.47999 Da, MH+=1515.95271 Da, Match Tol.=1.2 Da

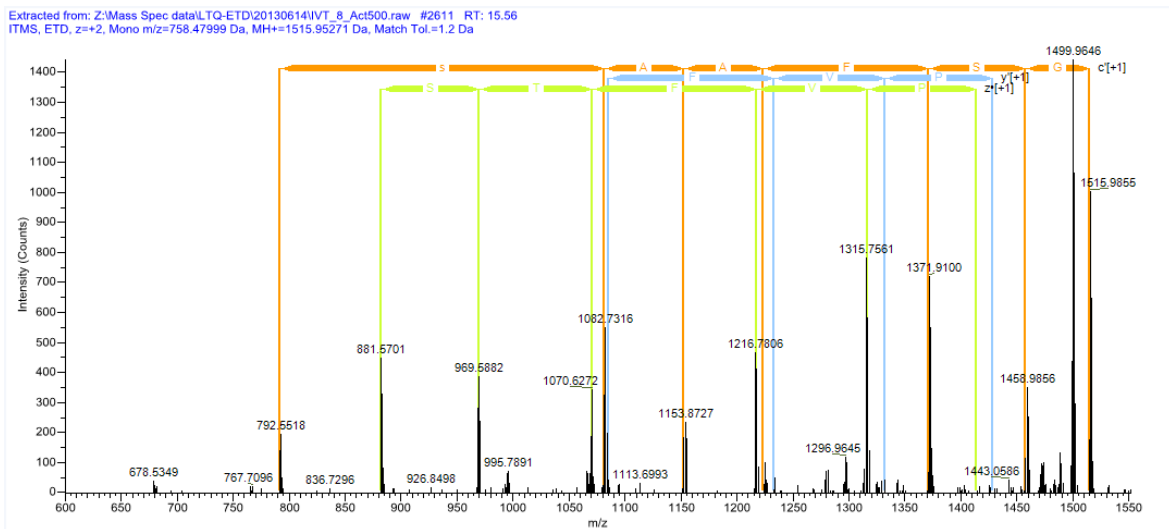

S P V F T S R S A A F S G

## 8. RET

Extracted from: Z:\Mass Spec data\LTQ-ETD\20130614\VT\_7\_Ac1500.raw #2909 RT: 17.48  
 ITMS, ETD, z=+2, Mono m/z=637.83999 Da, MH+=1274.67271 Da, Match Tol.=1.2 Da

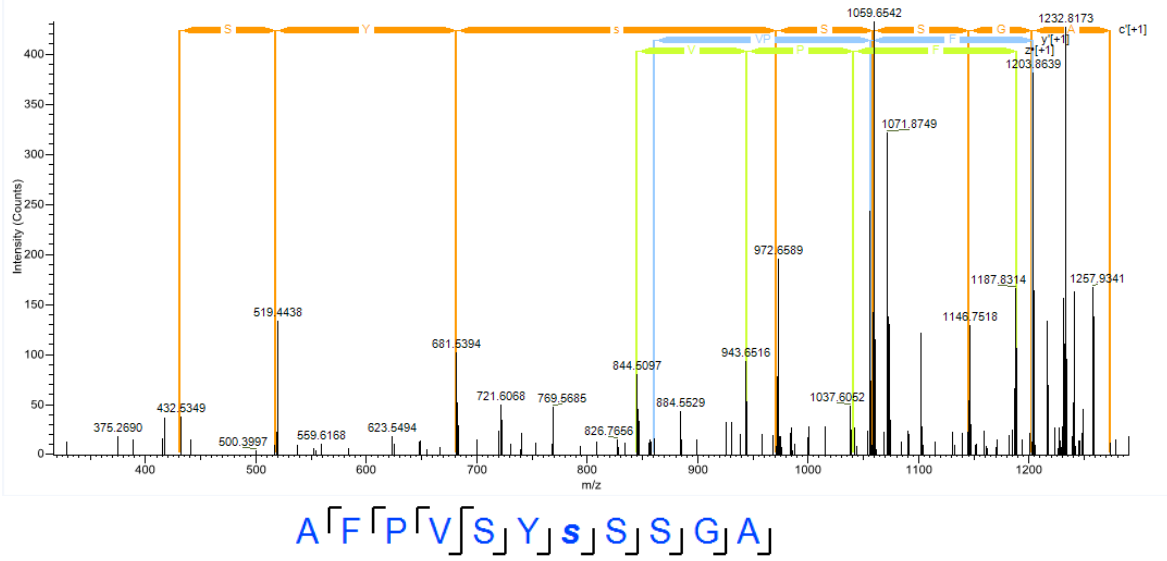

## 9. MYB-related B protein

Extracted from: Z:\Data ALL\LTQ-ETD\data\001\201303101616\Peptide15.raw #795 RT: 13.84  
 ITMS, ETD, z=+2, Mono m/z=767.64000 Da, MH+=1534.67272 Da, Match Tol.=1.2 Da

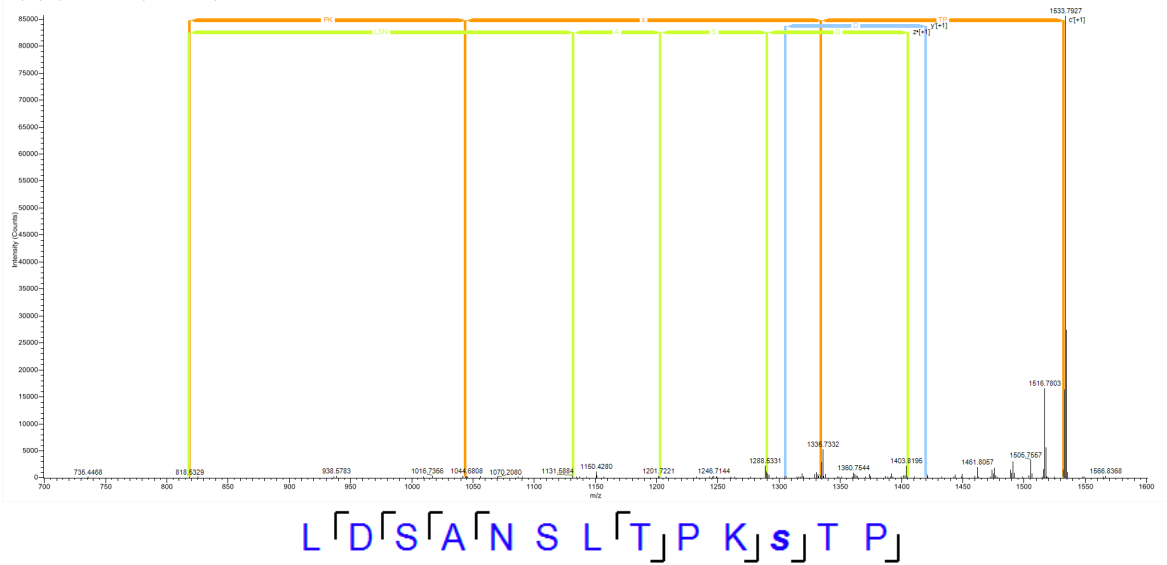

## 10. SCG

Extracted from: Z:\Mass Spec data\LTQ-ETD\20130614\VT\_14\_Act500.raw #3047 RT: 19.42  
 ITMS, ETD, z=+2, Mono m/z=798.54785 Da, MH+=1596.08843 Da, Match Tol.=1.2 Da

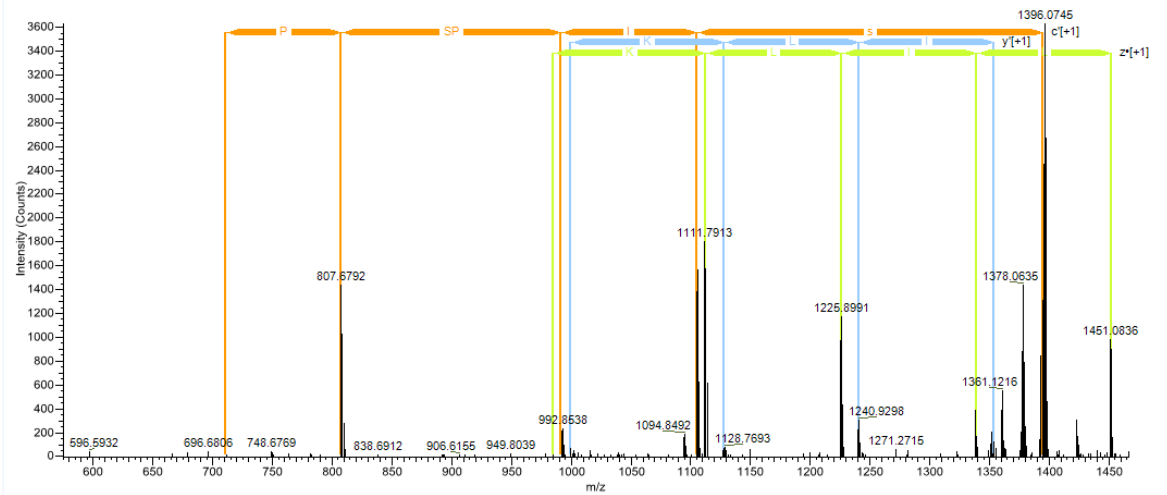

E L I L K P P S P I s E A

## 11. RBL2

Extracted from: Z:\Mass Spec data\LTQ-ETD\20130614\VT\_19\_Act500.raw #2774 RT: 17.27  
 ITMS, ETD, z=+2, Mono m/z=784.52979 Da, MH+=1568.05229 Da, Match Tol.=1.2 Da

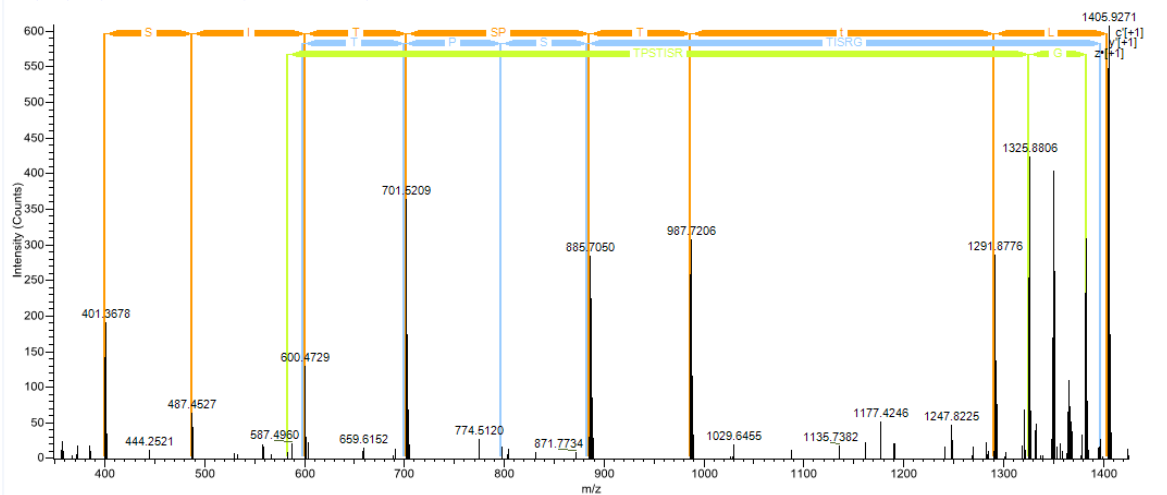

G L G R S I T S P T t L Y

## 12. GSK3β

Extracted from: Z:\Mass Spec data\LQ-ETD\20130618\IVT\_27\_Act500.raw #2327 RT: 15.61  
 ITMS, ETD, z=+3, Mono m/z=572.05865 Da, MH+=1714.16141 Da, Match Tol.=1.2 Da

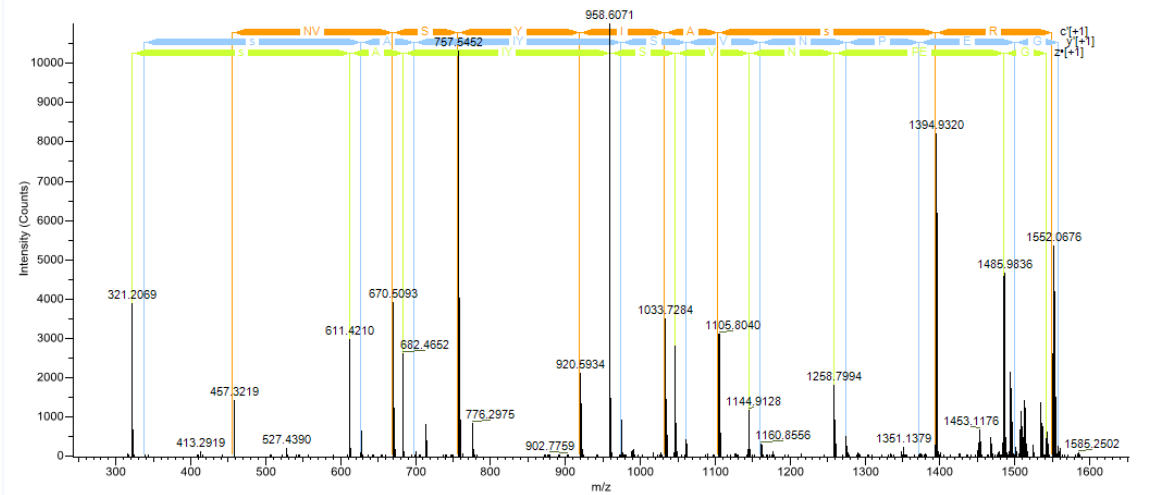

R[G]E P[N]V[S]Y[I]A[s]R]Y

Extracted from: Z:\Mass Spec data\LQ-ETD\20130618\IVT\_27\_Act500.raw #2342 RT: 15.78  
 ITMS, ETD, z=+3, Mono m/z=572.07623 Da, MH+=1714.21415 Da, Match Tol.=1.2 Da

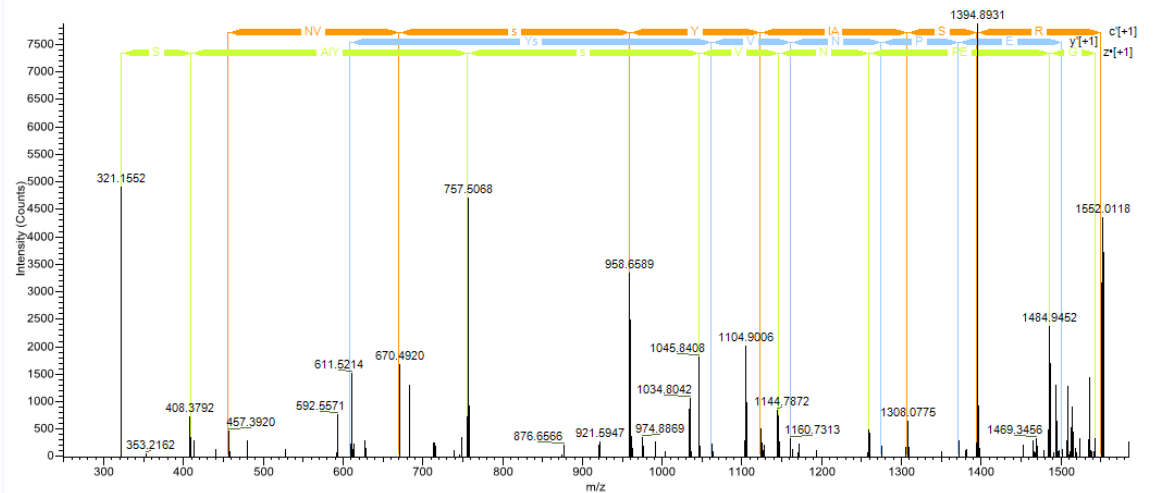

R[G]E P[N]V[s]Y[I]A[S]R]Y



### 13. Kv2.1

Extracted from: Z:\Mass Spec data\LQ-ETD\20130614\IVT\_13\_Act500.raw #2189 RT: 11.63  
 ITMS, ETD, z=+3, Mono m/z=529.04000 Da, MH+=1585.10544 Da, Match Tol.=1.2 Da

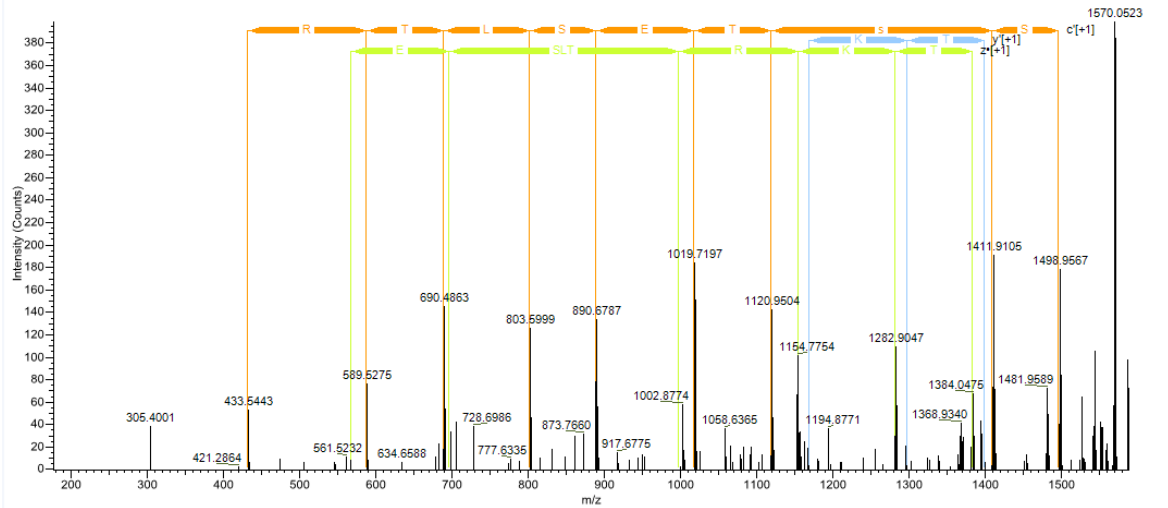

Extracted from: Z:\Mass Spec data\LQ-ETD\20130614\IVT\_13\_Act500.raw #2183 RT: 11.55  
 ITMS, ETD, z=+3, Mono m/z=571.72000 Da, MH+=1713.14544 Da, Match Tol.=1.2 Da

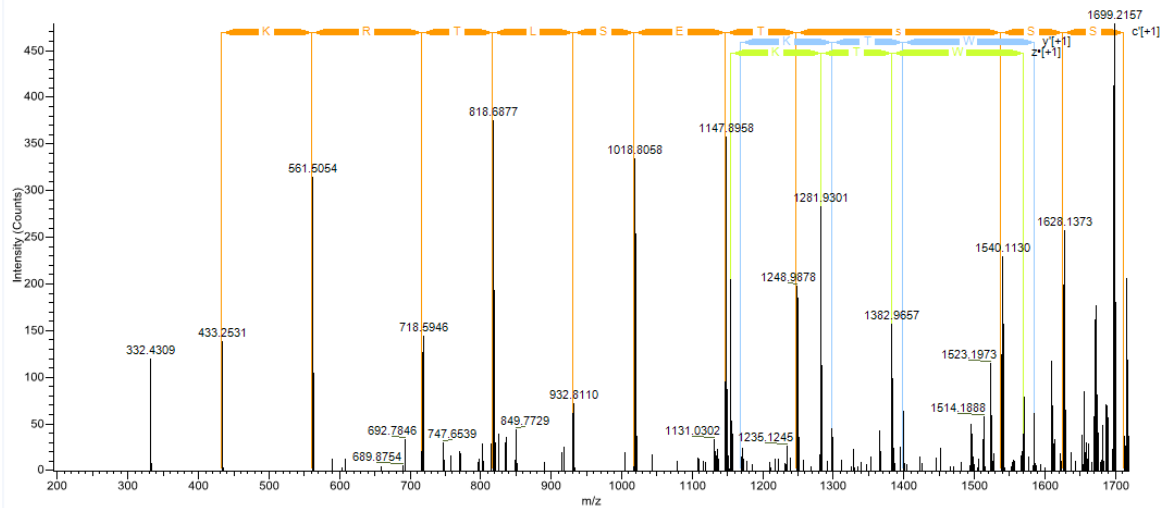

Extracted from: Z:\Mass Spec data\LQ-ETD\20130614\IVT\_13\_Act500.raw #2118 RT: 10.80  
 ITMS, ETD, z=+3, Mono m/z=571.73914 Da, MH+=1713.20285 Da, Match Tol.=1.2 Da

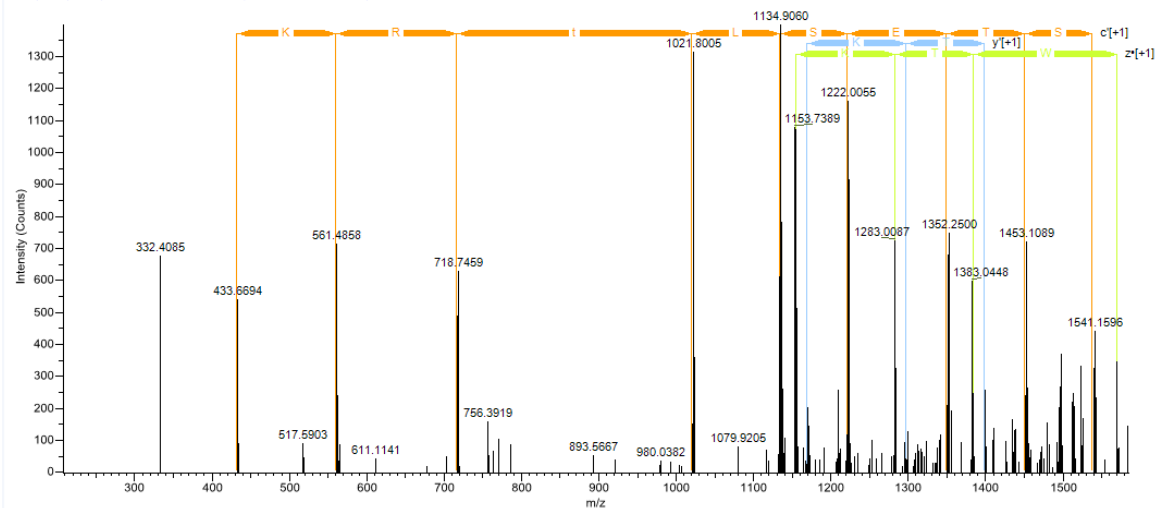

K<sup>W</sup>T<sup>K</sup>R<sup>t</sup>L<sup>S</sup>E<sup>T</sup>S<sup>S</sup>S

### 14. M phase phospho protein-9

Extracted from: Z:\Mass Spec data\LTQ-ETD\20130625\VT\_37\_Ac1500\_NoDE.raw #2308 RT: 13.71  
 ITMS, ETD, z=+3, Mono m/z=535.74304 Da, MH+=1665.21457 Da, Match Tol.=1.2 Da

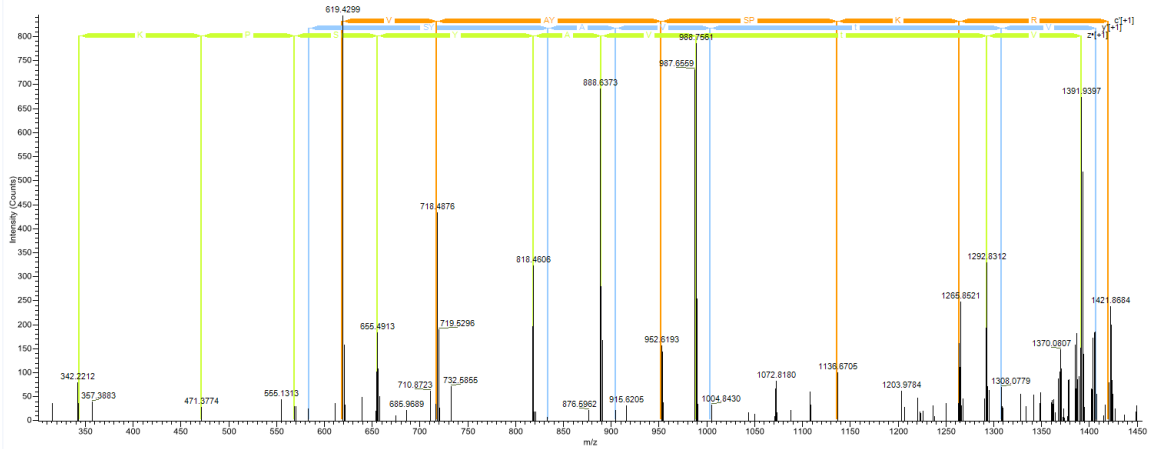

T<sup>P</sup>V<sup>t</sup>V<sup>A</sup>Y<sup>S</sup>P<sup>K</sup>R<sup>S</sup>P

### 15. Early E1A32Kd

Extracted from: Z:\Mass Spec data\LTQ-ETD\20130625\VT\_9\_Ac1500\_NoDE.raw #2316 RT: 12.30  
 ITMS, ETD, z=+3, Mono m/z=562.07208 Da, MH+=1684.20169 Da, Match Tol.=1.2 Da

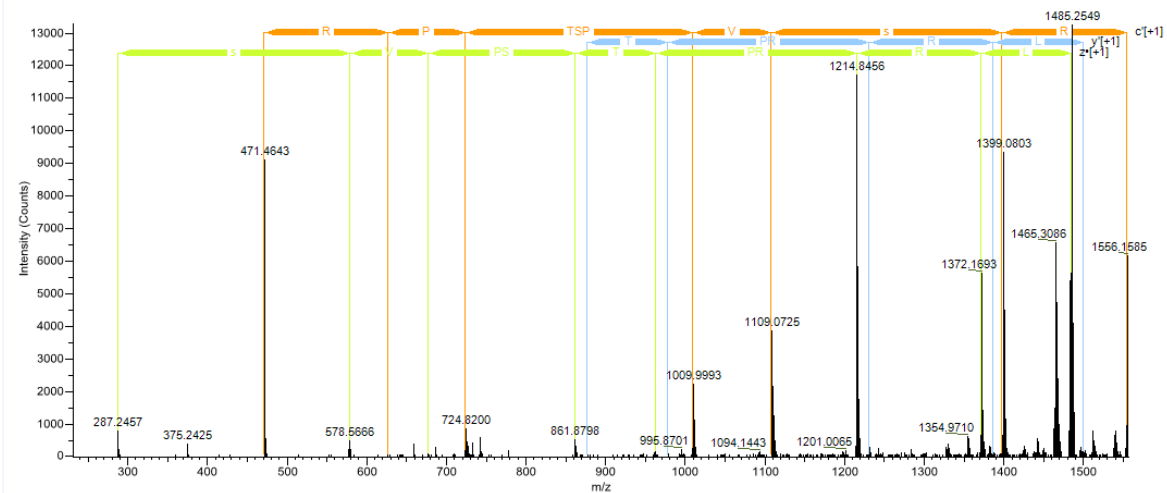

A<sup>I</sup>L<sup>R</sup>R<sup>R</sup>P<sup>T</sup>S<sup>P</sup>V<sup>S</sup>R<sup>E</sup>

## 16. Tau

Extracted from: Z:\Mass Spec data\LQ-ETD\20130618\VT\_29\_Act500.raw #2418 RT: 14.25  
 ITMS, ETD, z=+2, Mono m/z=626.51999 Da, MH+=1252.03271 Da, Match Tol.=1.2 Da

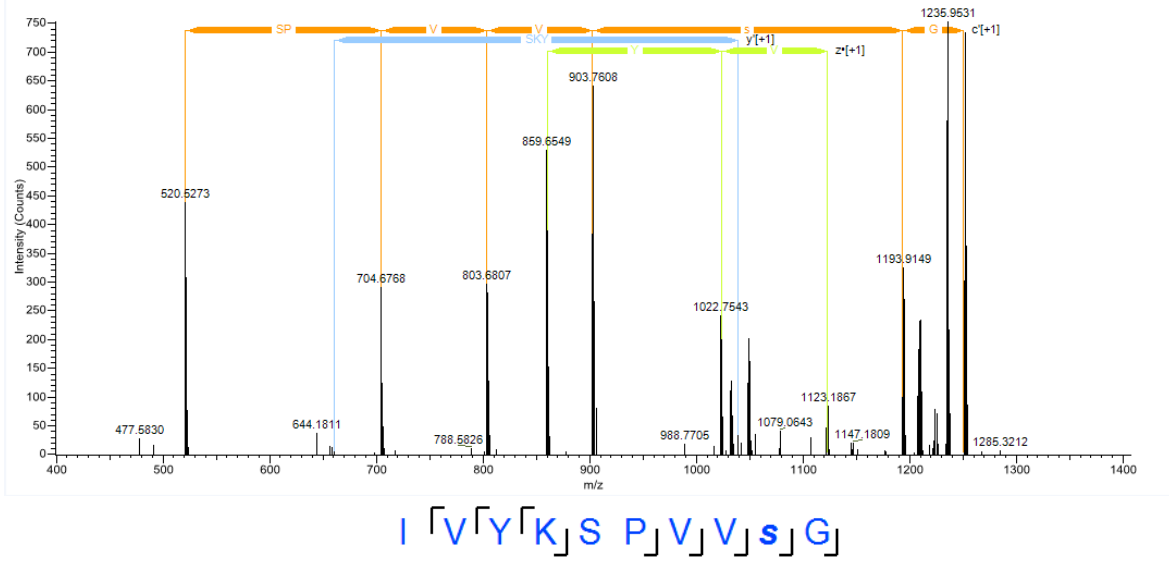

Extracted from: Z:\Mass Spec data\LQ-ETD\20130620\13133\_00001.raw #174 RT: 16.45  
 ITMS, ETD, z=+2, Mono m/z=754.42335 Da, MH+=1507.84343 Da, Match Tol.=1.2 Da

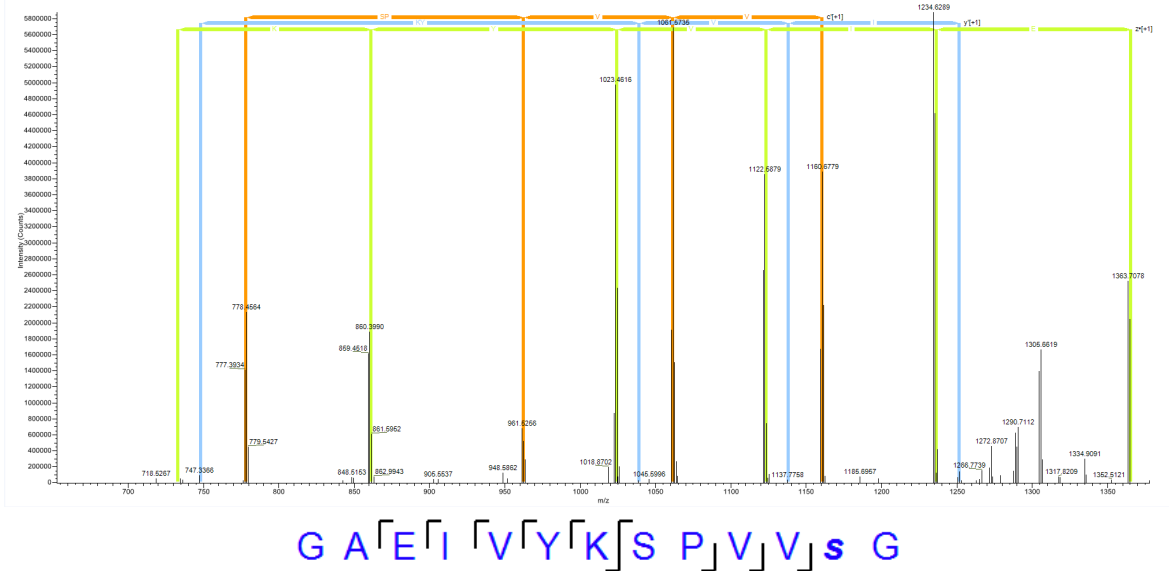

## 17. Rhodopsin-OPSD

Extracted from: Z:\Mass Spec data\LQ-ETD\20130625\VT\_40\_Act500\_NoE.raw #2057 RT: 11.35  
 ITMS, ETD, z=+2, Mono m/z=755.99048 Da, MH+=1510.87368 Da, Match Tol.=1.2 Da

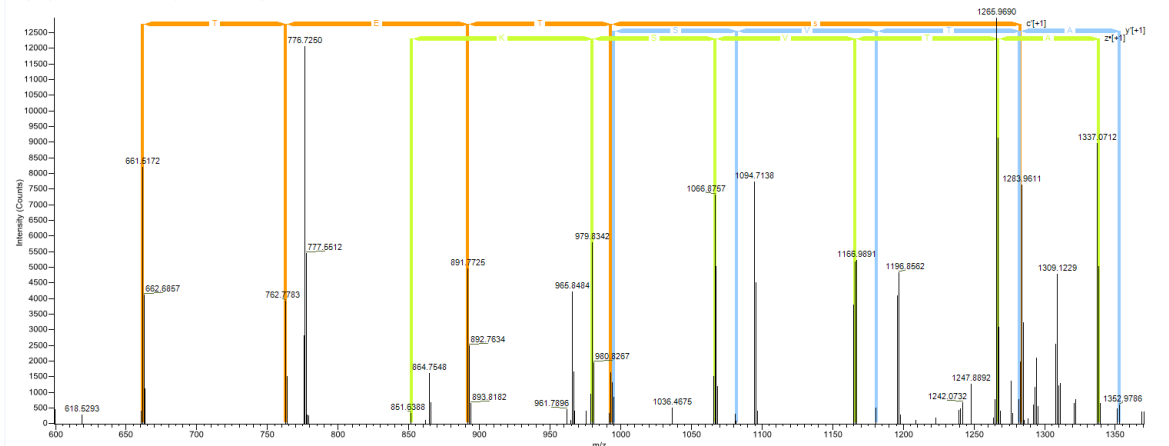

A S A T V S K T E T S Q V

Extracted from: Z:\Mass Spec data\LTQ-ETD\20130625\VT\_40\_Act500\_NoDE.raw #2057 RT: 11.35  
 ITMS, ETD, z=+2, Mono m/z=755.99048 Da, MH+=1510.97368 Da, Match Tol.=1.2 Da

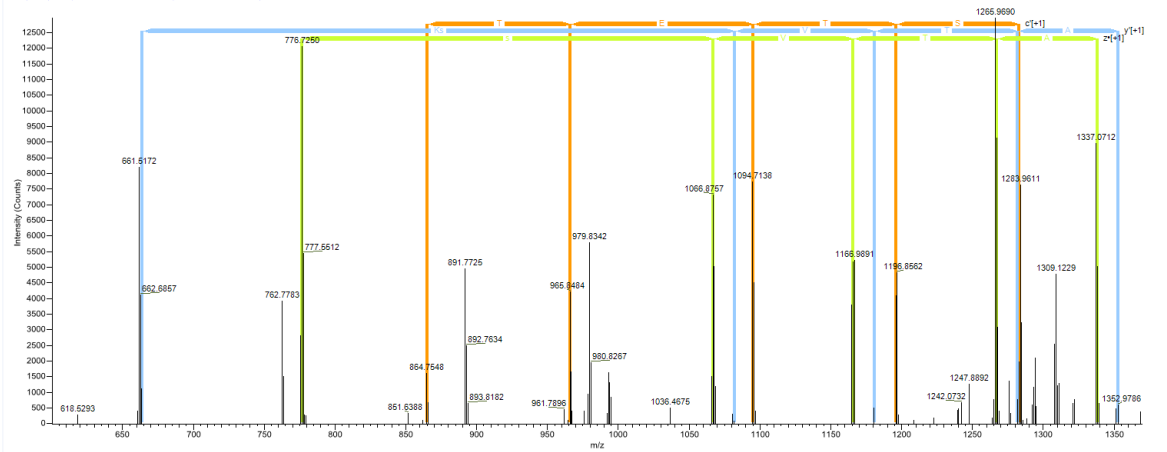

A S A T V S K T E T S Q V

### 18. Insulin receptor substrate-1

Extracted from: Z:\Mass Spec data\LTQ-ETD\20130614\VT\_15\_Act500.raw #2469 RT: 14.87  
 ITMS, ETD, z=+2, Mono m/z=860.97913 Da, MH+=1720.95098 Da, Match Tol.=1.2 Da

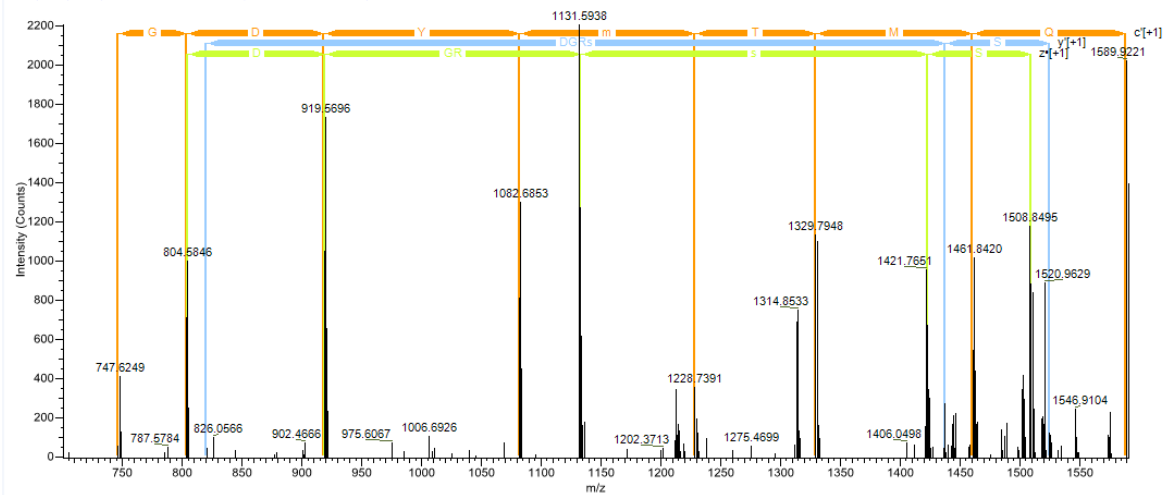

V P S s R G D Y m T M Q M

Extracted from: Z:\Mass Spec data\LTQ-ETD\20130614\VT\_15\_Act500.raw #2648 RT: 16.85  
ITMS, ETD, z=+3, Mono m/z=569.04419 Da, MH+=1705.11802 Da, Match Tol.=1.2 Da

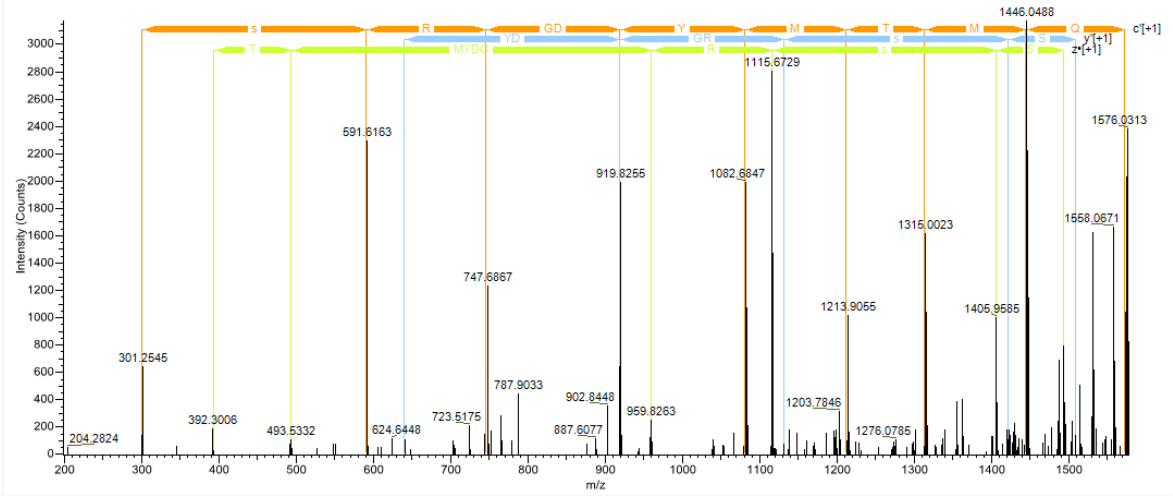

V P [S] s [R] [G D] Y [M] [T] [M] Q [M]

## 19. Lamin B1

Extracted from: Z:\Mass Spec data\LTQ-ETD\20130614\IVT\_20\_Act5000.raw #2173 RT: 12.19  
 IMMS, ETD, z=+3, Mono m/z=1600.9454 Da, MH+=1647.1644 Da, Match Tol.=1.2 Da

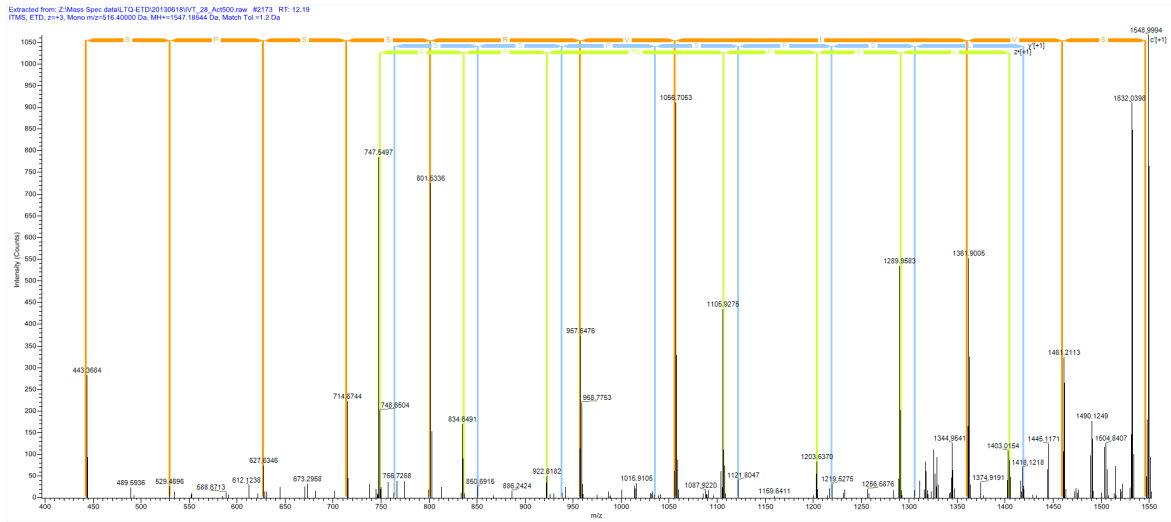

K L S P S P S S R V t V S

## 20. Lamin A

Extracted from: Z:\Mass Spec data\LTQ-ETD\20130614\IVT\_20\_Act5000.raw #2334 RT: 12.53  
 IMMS, ETD, z=+3, Mono m/z=534.32001 Da, MH+=1600.94547 Da, Match Tol.=1.2 Da

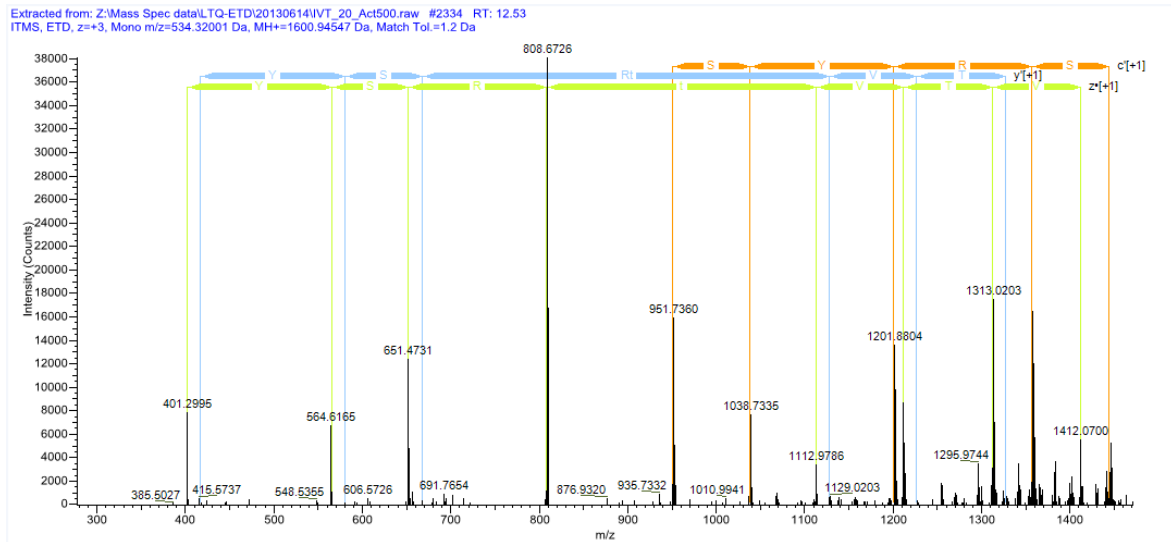

S S V T V t R S Y R S V G

Extracted from: Z:\Mass Spec data\LQ-ETD\20130614\IVT\_20\_Act500.raw #2306 RT: 12.23  
 ITMS, ETD, z=+3, Mono m/z=534.36000 Da, MH+=1601.06544 Da, Match Tol.=1.2 Da

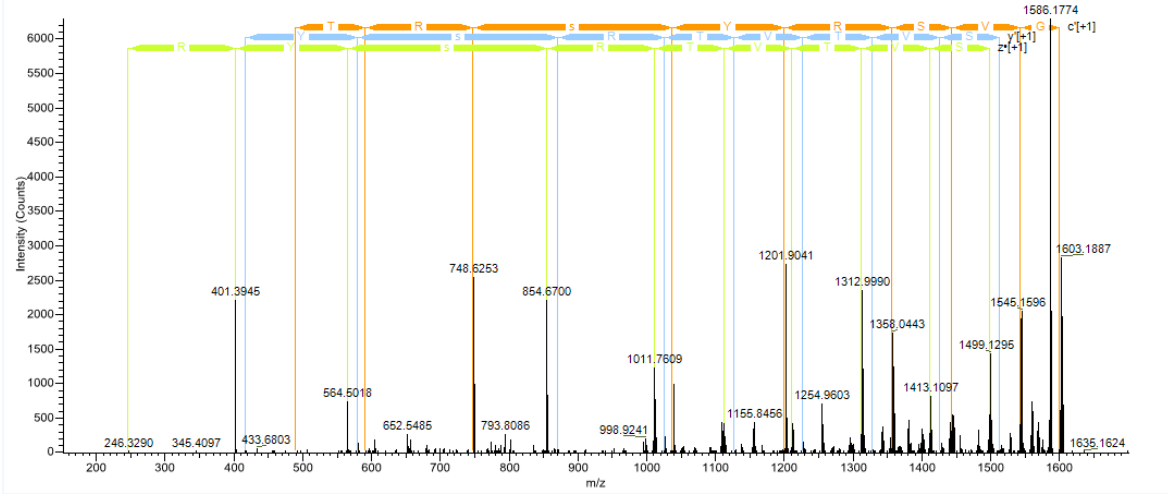

S[S]V[T]V[T]R[s]Y[R]S[V]G

Extracted from: Z:\Mass Spec data\LQ-ETD\20130614\IVT\_20\_Act500.raw #2303 RT: 12.19  
 ITMS, ETD, z=+3, Mono m/z=505.36000 Da, MH+=1514.06544 Da, Match Tol.=1.2 Da

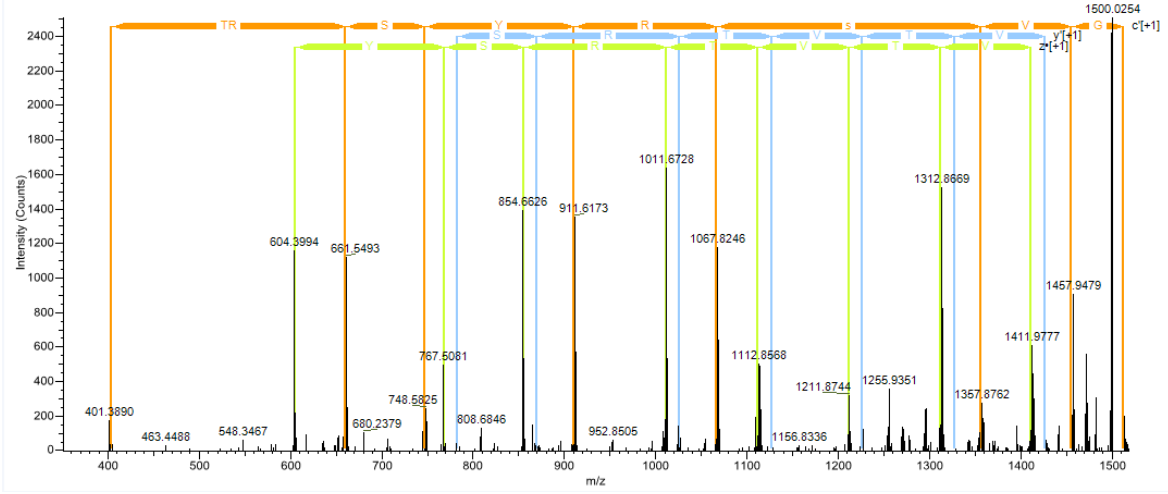

S[V]T[V]T[R]S[Y]R[s]V[G]

## 21. CGKI

Extracted from: Z:\Mass Spec data\LQ-ETD\20130614\VT\_11\_Act500.raw #2252 RT: 11.83  
 ITMS, ETD, z=+3, Mono m/z=537.72000 Da, MH+=1611.14544 Da, Match Tol.=1.2 Da

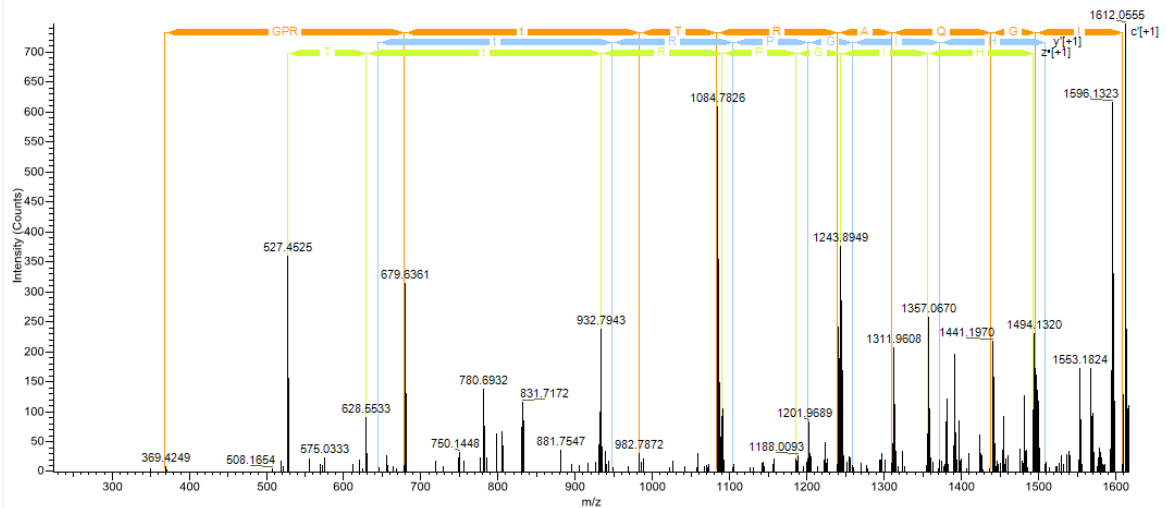

T H I G P R t T R A Q G I

## 22. ELK1

Extracted from: Z:\Mass Spec data\LQ-ETD\20130614\VT\_11\_Act500.raw #2000 RT: 18.04  
 ITMS, ETD, z=+2, Mono m/z=624.4033 Da, MH+=1176.8758 Da, Match Tol.=1.2 Da

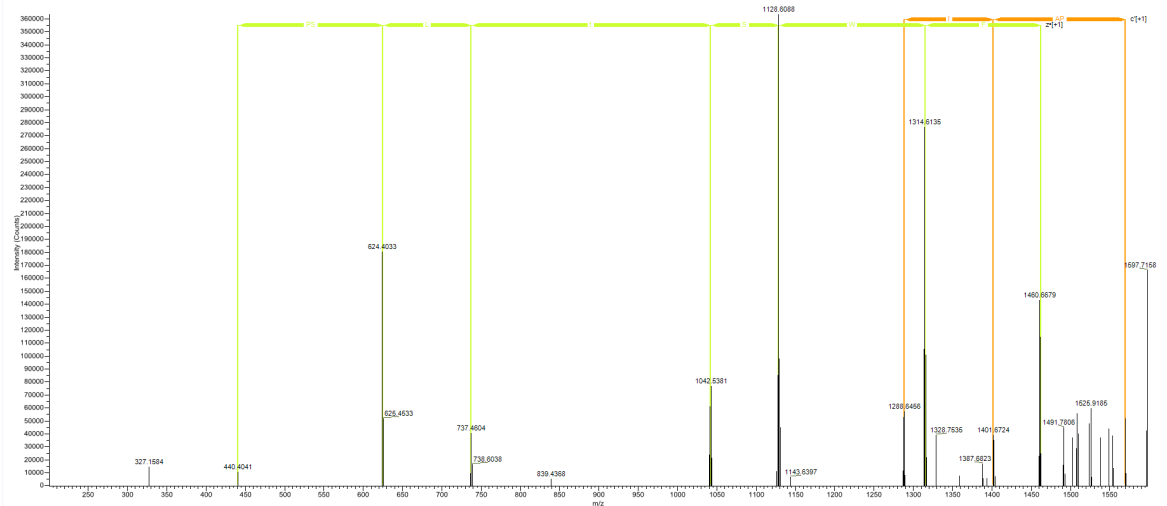

I H F W S t L S P I A P R



## 23. BCKD kinase

Extracted from: Z:\Mass Spec data\LTQ-ETD\20130625\VT\_47\_Act500\_NoDE.raw #2272 RT: 13.19  
 ITMS, ETD, z=+3, Mono m/z=584.94000 Da, MH+=1750.10543 Da, Match Tol.=1.2 Da

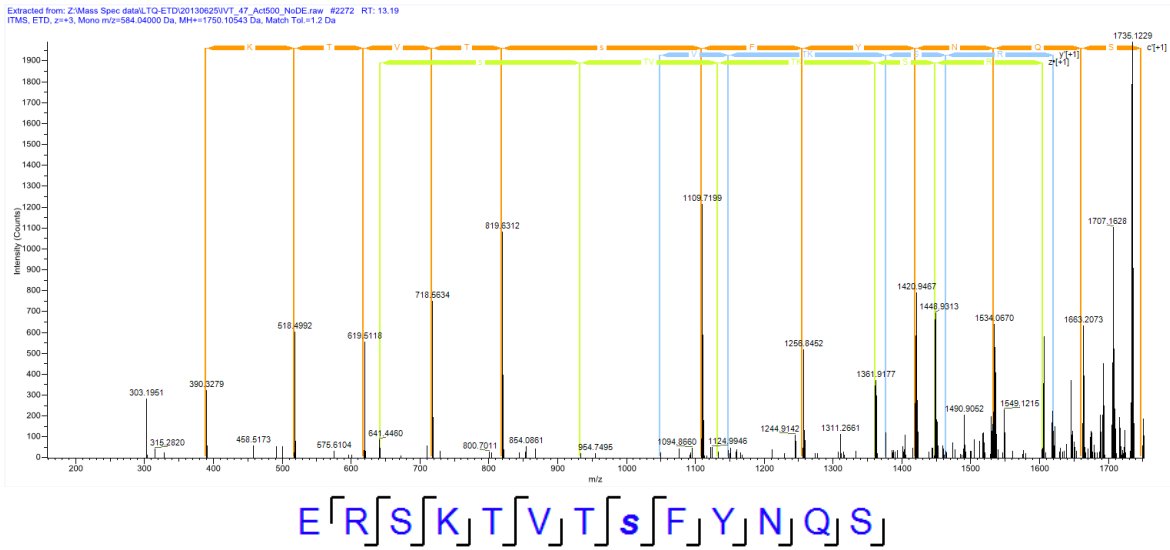

Extracted from: Z:\Mass Spec data\LTQ-ETD\20130625\VT\_47\_Act500\_NoDE.raw #2249 RT: 12.92  
 ITMS, ETD, z=+3, Mono m/z=583.71695 Da, MH+=1749.13539 Da, Match Tol.=1.2 Da

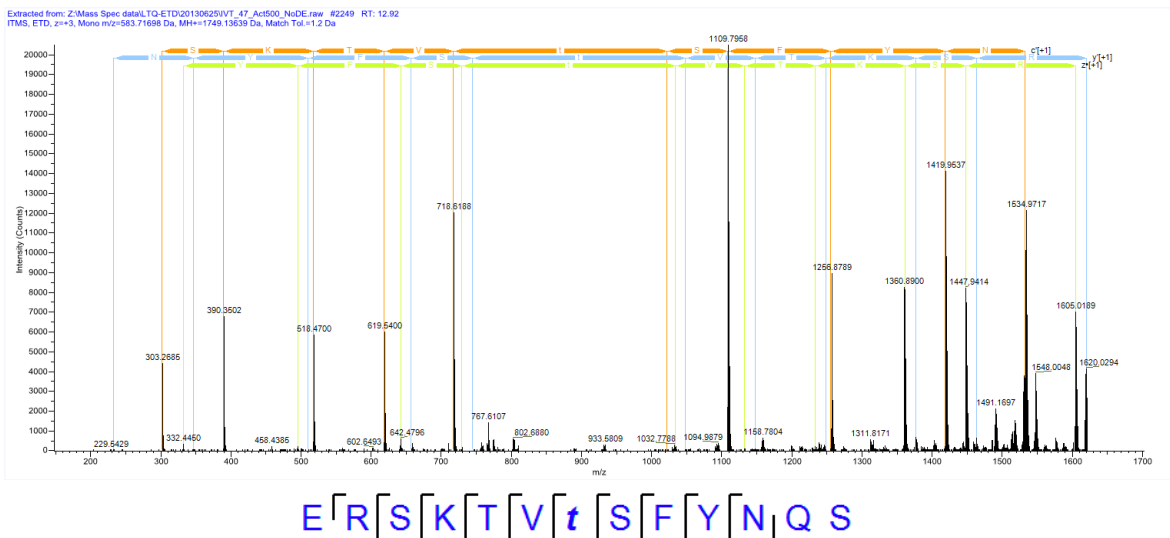

Extracted from: Z:\Mass Spec data\LTQ-ETD\20130625\VT\_47\_Act500\_NoDE.raw #2293 RT: 13.44  
 ITMS, ETD, z=+3, Mono m/z=583.73346 Da, MH+=1749.16583 Da, Match Tol.=1.2 Da

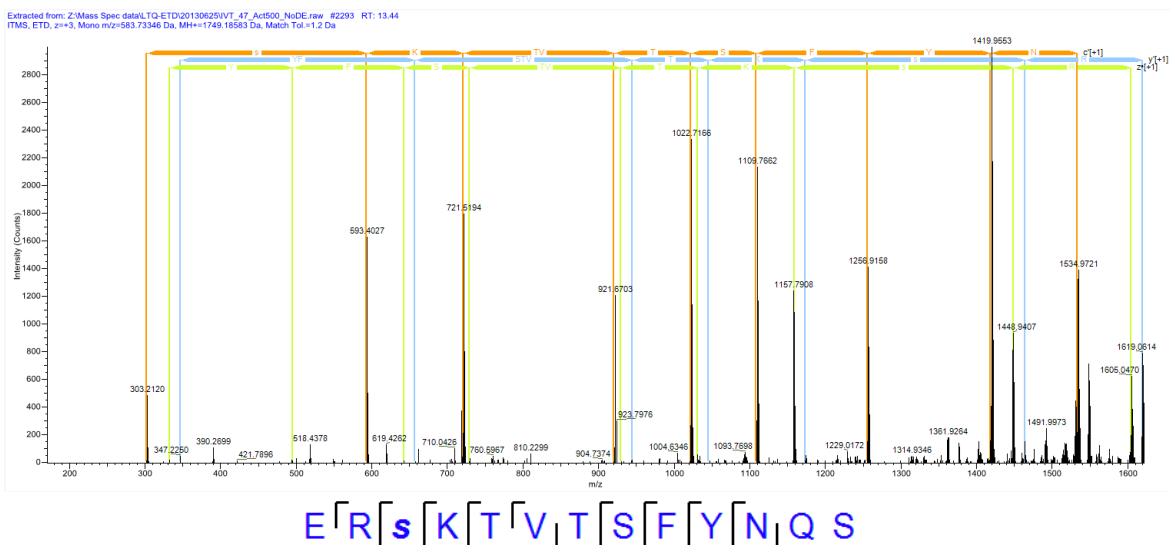

## 24. Phospholipase C-γ2

Extracted from: Z:\Jana ALL TO ETD data\Sept 2019\20190909\2019140\_sqoon.fw #2169 RT: 19.49

IMS, ETD, z=+3, Mono m/z=189301 Da, MH+=18333946 Da, MassTol=1.2 Da

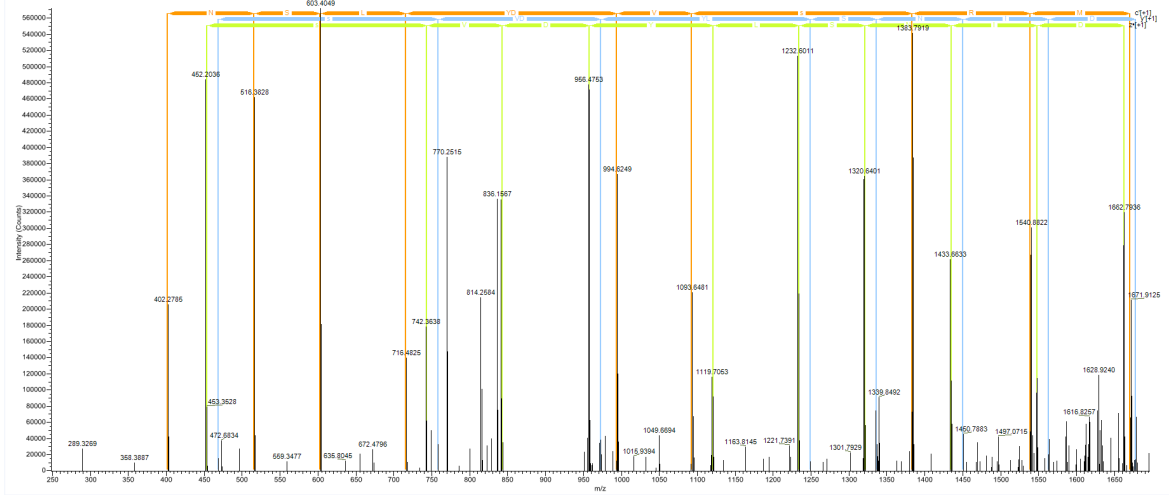

R[D]I[N]S[L]Y[D]V[S]R[M]Y

## 25. HSP27

Extracted from: Z:\Mass Spec data\LTQ-ETD\20130625\VT\_74\_Act1500\_NoDE.fw #2451 RT: 13.78

IMS, ETD, z=+3, Mono m/z=546.68000 Da, MH+=1638.02544 Da, Match Tol=1.2 Da

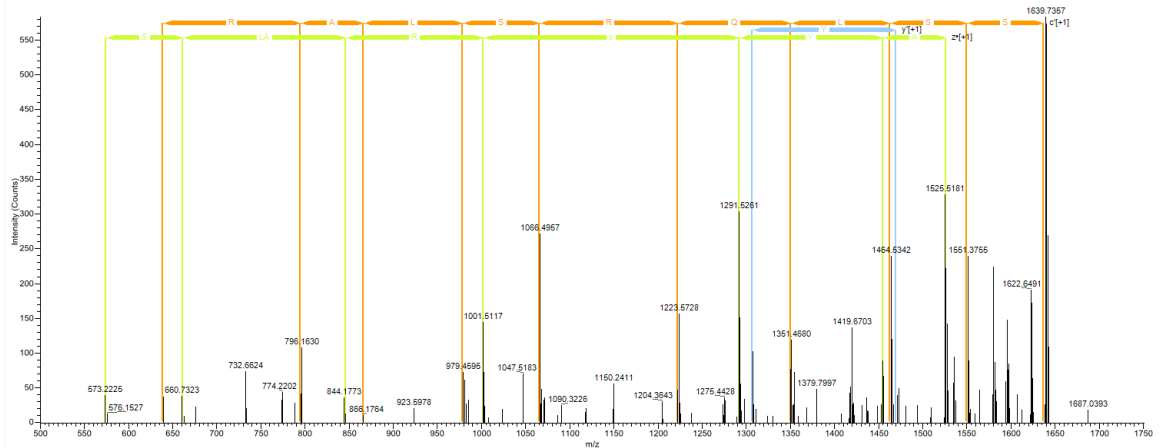

P[A]Y[S]R[A]L[S]R[Q]L[S]S

## 26. Desmocollin-3

Extracted from: Z:\Mass Spec data\LTQ-ETD\20130625\VT\_44\_Act500\_NoDE.raw #2385 RT: 14.11  
 FTMS, ETD, z=+2, Mono m/z=790.96436 Da, MH+=1560.92143 Da, Match Tol.=1.2 Da

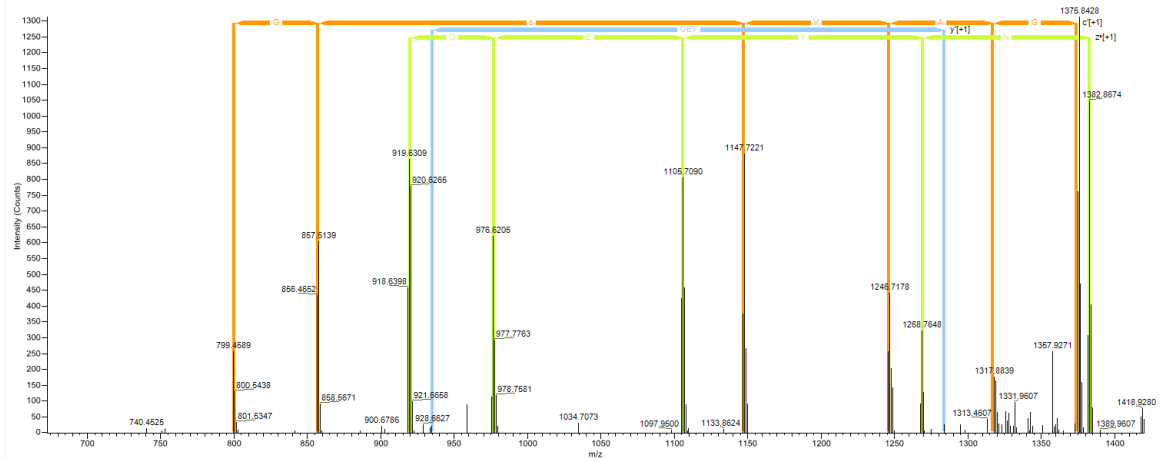

Y<sup>1</sup>N<sup>1</sup>Y<sup>1</sup>E<sup>1</sup>G<sup>1</sup>R<sup>1</sup>G<sup>1</sup>s<sup>1</sup>V<sup>1</sup>A<sup>1</sup>G<sup>1</sup>S<sup>1</sup>V

## 27. DOUBLIN

Extracted from: Z:\Jana ALI\LTQ-ETD data\Sept 2019\20190909\2013142\_sqon1.raw #2648 RT: 21.87  
 FTMS, ETD, z=+3, Mono m/z=864.41331 Da, MH+=1595.91839 Da, Match Tol.=1.2 Da

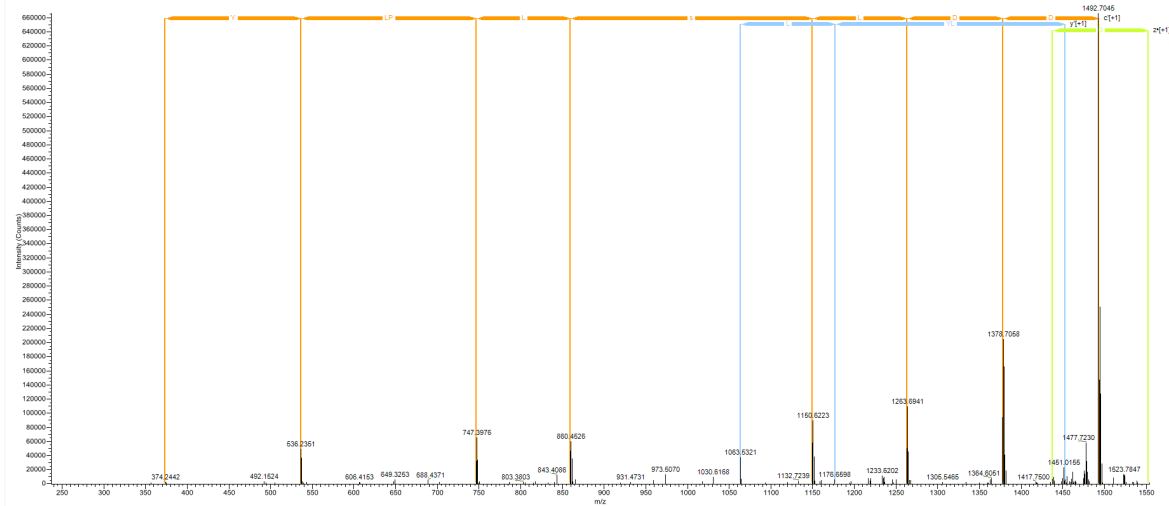

K<sup>1</sup>D<sup>1</sup>L<sup>1</sup>Y<sup>1</sup>L<sup>1</sup>P<sup>1</sup>L<sup>1</sup>s<sup>1</sup>L<sup>1</sup>D<sup>1</sup>D<sup>1</sup>S<sup>1</sup>D<sup>1</sup>

**Table S2.**

X-ray diffraction data collection and structure refinement statistics. Values for the highest resolution shell are given in brackets.

|                                                     | hOGT +<br>UDP-5SGlcNAc +<br>RB-like 2 (411—422)         | hOGT +<br>UDP-5SGlcNAc +<br>keratin-7 (7—19)   | hOGT +<br>UDP-5SGlcNAc +<br>Ret (660—672)      | hOGT +<br>UDP-5SGlcNAc +<br>lamin B1 (179—191)          |
|-----------------------------------------------------|---------------------------------------------------------|------------------------------------------------|------------------------------------------------|---------------------------------------------------------|
| <b>Data collection</b>                              |                                                         |                                                |                                                |                                                         |
| Beamline,<br>wavelength                             | ID30A-3, 0.9677 Å                                       | ID23-2, 0.873 Å                                | I04-1, 0.922 Å                                 | I04-1, 0.922 Å                                          |
| Space group                                         | <i>F</i> 222                                            | <i>P</i> 321                                   | <i>P</i> 321                                   | <i>F</i> 222                                            |
| Cell dimensions<br>(Å)                              | <i>a</i> =138.53, <i>b</i> =151.61,<br><i>c</i> =200.43 | <i>a</i> = <i>b</i> =275.1,<br><i>c</i> =143.1 | <i>a</i> = <i>b</i> =274.6,<br><i>c</i> =142.3 | <i>a</i> =138.18, <i>b</i> =150.18,<br><i>c</i> =199.24 |
| Resolution (Å)                                      | 46.20-2.05 (2.16-<br>2.05)                              | 25.00-3.15 (3.32-<br>3.15)                     | 91.26-3.38 (3.56-<br>3.38)                     | 30.00-2.40 (2.53-2.40)                                  |
| <i>R</i> <sub>merge</sub>                           | 0.070 (0.826)                                           | 0.122 (0.508)                                  | 0.144 (0.674)                                  | 0.104 (0.719)                                           |
| <i>I</i> / <i>σ</i> <i>I</i>                        | 17.4 (2.5)                                              | 5.5 (1.6)                                      | 7.4 (2.1)                                      | 11.8 (2.4)                                              |
| <i>CC</i> <sub>1/2</sub>                            | 0.99 (0.85)                                             | 0.99 (0.91)                                    | 0.97 (0.60)                                    | 0.99 (0.82)                                             |
| <i>R</i> <sub>meas</sub>                            | 0.076 (0.897)                                           | 0.172 (0.714)                                  | 0.197 (0.887)                                  | 0.114 (0.78)                                            |
| <i>R</i> <sub>pim</sub>                             | 0.029 (0.349)                                           | 0.121 (0.502)                                  | 0.100 (0.449)                                  | 0.044 (0.30)                                            |
| Completeness<br>(%)                                 | 100 (100)                                               | 99.4 (99.4)                                    | 99.4 (99.1)                                    | 99.9 (100)                                              |
| Redundancy                                          | 6.7 (6.6)                                               | 1.7 (1.7)                                      | 3.4 (3.0)                                      | 6.5 (6.7)                                               |
| <b>Refinement</b>                                   | 46.20—2.05 Å                                            | 25.00—3.15 Å                                   | 30.00—3.38 Å                                   | 30.00-2.40                                              |
| No. total<br>reflections                            | 443970                                                  | 183993                                         | 284765                                         | 263631                                                  |
| No. unique<br>reflections                           | 65809                                                   | 106474                                         | 84183                                          | 40463                                                   |
| <i>R</i> <sub>work</sub> , <i>R</i> <sub>free</sub> | 0.195 / 0.229                                           | 0.190 / 0.217                                  | 0.193 / 0.222                                  | 0.187 / 0.235                                           |
| No. atoms                                           |                                                         |                                                |                                                |                                                         |
| Protein                                             | 5516                                                    | 22140                                          | 22056                                          | 5489                                                    |
| Nucleotide<br>sugar                                 | 39                                                      | 156                                            | 156                                            | 39                                                      |
| Peptide                                             | 47                                                      | 292                                            | 205                                            | 50                                                      |
| <i>B</i> -factor<br>average                         |                                                         |                                                |                                                |                                                         |
| Protein                                             | 44.75                                                   | 54.43                                          | 70.84                                          | 45.17                                                   |
| Nucleotide<br>sugar                                 | 36.11                                                   | 46.01                                          | 66.81                                          | 31.43                                                   |
| Peptide                                             | 44.13                                                   | 69.76                                          | 95.12                                          | 60.43                                                   |
| R.m.s. deviation<br>s                               |                                                         |                                                |                                                |                                                         |
| Bond lengths<br>(Å)                                 | 0.010                                                   | 0.095                                          | 0.075                                          | 0.012                                                   |
| Bond angles<br>(°)                                  | 1.381                                                   | 1.31                                           | 1.19                                           | 1.49                                                    |
| <b>Pdb ID</b>                                       | 4XIE                                                    | 4XIF                                           | 4XI9                                           | 5BNW                                                    |

**Figure S2. a-b** Unbiased  $F_o - F_c$  difference electron density for ligands (UDP-5S-GlcNAc and peptide) contoured at  $2.25 \sigma$ . **c-d** Unbiased, NCS-averaged  $F_o - F_c$  difference electron density for ligands (UDP-5S-GlcNAc and peptide) contoured at  $3.5 \sigma$ . **e,f** Previously reported OGT substrate complexes. The entire sequence of the peptides used in the study is given; underlined residues are represented in the final model.

**a.** pRB2<sub>411–422</sub>  
KENPAVTPVSTA

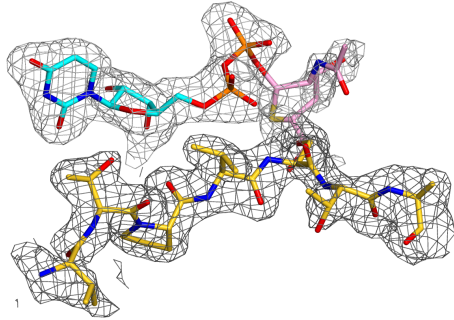

**b.** Lamin B1<sub>389–401</sub>

KLSPSPSSRVTVS

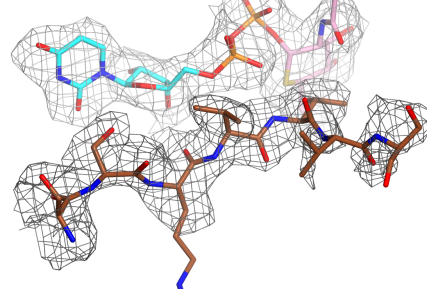

**c.** RET<sub>660–672</sub>  
AQAFPVSYSSGA

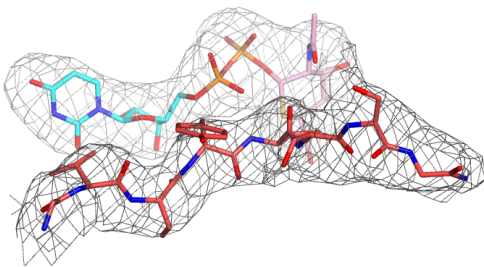

**d.** Keratin 7<sub>7–19</sub>  
SPVFTSRSAAFSC

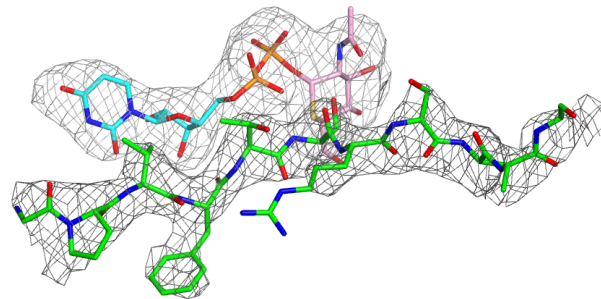

**e.** Tab1<sub>389–401</sub> (PdbID 4AY6)  
PVSVPYSSAQSTS

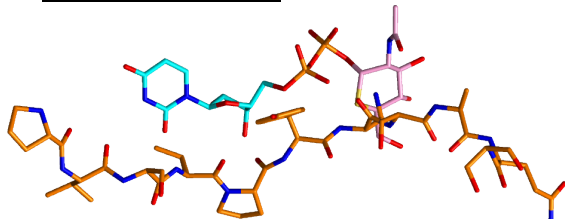

**f.** CK2 $\alpha$ <sub>340–352</sub> (PdbID 4GYY)  
YPGGSTPVSSANMM

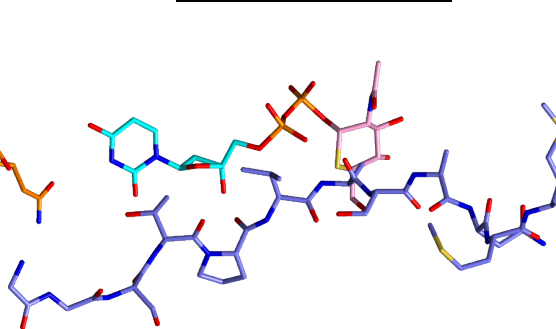



**Figure S4.**

Tolerance of different OGT isoforms for single amino acid substitutions.

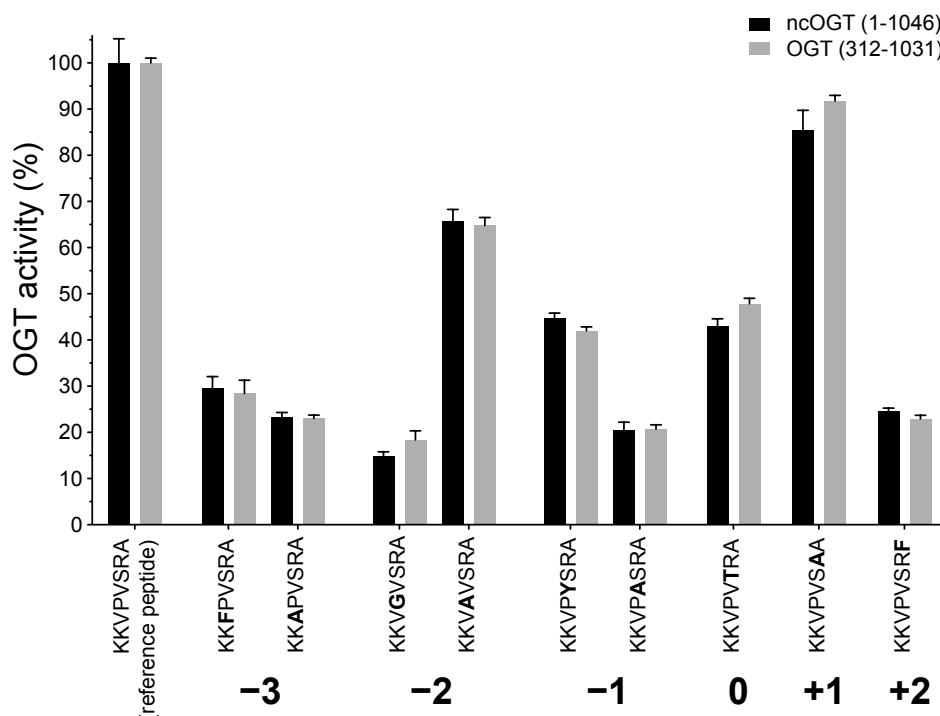

OGT activity on the reference peptide KKVPVSRA was measured with two different constructs of the enzyme possessing a different number of TPR repeats. Nucleocytoplasmic OGT (ncOGT) is the longest (full length) natural OGT isoform, whereas the truncated construct, OGT (312–1031), was used for crystallographic studies and library screening due to its increased stability. The reference peptide KKVPVSRA represents the optimal OGT hexapeptide sequon except for position –3, where Val was used in order to avoid a potential second O-GlcNAc acceptor. Two N-terminal Lys residues were added, in order to aid peptide solubility. Assay details are given in the Online Methods section. The average of three measurements is shown, with error bars depicting the s.e.m. Activity for each enzyme isoform was normalized to the reference peptide.
